# Supplementary material for: Albino Leaf 2 is involved in the splicing of chloroplast group I and II introns in rice
Source: PubMed Central journal article supplement (PMC5049385; doi:10.1093/jxb/erw296), 2016-08-19
Supplement: supp_erw296_supplementary_figures_S1_S4_table_S1.pdf [file supp_erw296_supplementary_figures_S1_S4_table_S1.pdf]

**Supplemental Table S1.** Primers used in this study.

|                   | Name                        | Sequence of Primers (5'-3')                | Annotation/vector                           |
|-------------------|-----------------------------|--------------------------------------------|---------------------------------------------|
| Flanking of T-DNA | C1                          | 5'-TggCgTAATAgCgAAgAggCC-3'                | T-DNA right border primer#1 for inverse PCR |
|                   | H1                          | 5'-AATAACAgAgTCTAgCACCTCg-3'               | T-DNA left border primer#2 for inverse PCR  |
|                   | C2                          | 5'-AATggCgAATgCTAgAgC-3'                   | T-DNA right border primer#3 for inverse PCR |
|                   | H2                          | 5'-CTACCCAATCTTTTgTgC-3'                   | T-DNA left border primer#4 for inverse PCR  |
|                   | F1                          | 5'-ACCAgATgCggAgTTACTTCA-3'                | flanking of T-DNA                           |
|                   | R1                          | 5'-TCCTCAggTTCTCTTCATCC-3'                 | with 5TF1 for test flanking of T-DNA        |
|                   | 5TR1                        | 5'-TCgTCCgAgggCAAAGAAATAgA-3'              | T-DNA right border                          |
|                   | 5TF1                        | 5'-gCACCGATCgCCCTTCCCAACA-3'               | T-DNA left border                           |
|                   | Antisense                   | anti-f                                     | 5'-ggCCggATCCCAATTggTTTCTgACgAgg-3'         |
| anti-r            |                             | 5'-ggCCgTCgACCCACAATgAgCTgAgTgACCC-3'      |                                             |
| Promoter          | pro-f                       | 5'-TTgCATgCCTgCAGggTgggAATTCgCTTggAT-3'    | P1300GUSnos                                 |
|                   | pro-r                       | 5'-ggggatcctctagaggAgAggAgCTCCgATgAgAgA-3' |                                             |
| Complementation   | Comp-f                      | 5'-ggCCAAgCTTgTgATTTTgAACCCggTTTTATCT-3'   | pCAMBIA 1301                                |
|                   | Comp-r                      | 5'-ggCCggTACCAATCgCgCTCTCAgCTTTgA-3'       |                                             |
| qRT-PCR           | 410q-f1                     | 5'-CCATgTTTCTTCAggTggTg-3'                 |                                             |
|                   | 410q-r1                     | 5'-CACTCAATCgCagCATTCT-3'                  |                                             |
|                   | 410q-f2                     | 5'-ggACTgAATCgCTCagCATA-3'                 |                                             |
|                   | 410q-r2                     | 5'-AAgCAAgtCagCATCCACAg-3'                 |                                             |
|                   | OsHAP3A-f                   | 5'-TCTgTTAAggAAgAACCCAC-3'                 |                                             |
|                   | OsHAP3A-r                   | 5'-TAgATTTgTgCCACCTgATA-3'                 |                                             |
|                   | OsHAP3B-f                   | 5'-AACTgCAAaggCTggTgATggCTCT-3'            |                                             |
|                   | OsHAP3B-r                   | 5'-TACATCTgAgAAgCagCCTTggCTC-3'            |                                             |
|                   | OsHAP3C-f                   | 5'-ggTCAATgggCACgCTCggATTCg-3'             |                                             |
|                   | OsHAP3C-r                   | 5'-ggAACTTTAgAAgCATCCTgCTTAC-3'            |                                             |
|                   | OsPPR1-f                    | 5'-CATTgATTTcAgCTACACTA-3'                 |                                             |
|                   | OsPPR1-r                    | 5'-AgCATTgTCATTCggTCT-3'                   |                                             |
|                   | YGL1-f                      | 5'-TCTTggTgCgAgCTACATTg-3'                 |                                             |
|                   | YGL1-r                      | 5'-gCTTgCCTgAACTgAAAagg-3'                 |                                             |
|                   | cab1R-f                     | 5'-AgATgggTTTAgTgCgACgAg-3'                |                                             |
|                   | cab1R-r                     | 5'-TTTgggATCgAgggAgTATTT-3'                |                                             |
|                   | HEMA1-f                     | 5'-CgCTATTTCTgATgCTATgggT-3'               |                                             |
|                   | HEMA1-r                     | 5'-TCTTgggTgATgATTgTTTgg-3'                |                                             |
|                   | Cao-f                       | 5'-TCAACCATggCATCTCAAA-3'                  |                                             |
|                   | Cao-r                       | 5'-CgTgATgCTgTCgCTAgTgT-3'                 |                                             |
|                   | psaA-f                      | 5'-TTAgAAATCCgCCAATCCA-3'                  |                                             |
|                   | psaA-r                      | 5'-TgCTAggCTCTACAACCATT-3'                 |                                             |
|                   | psaB-f                      | 5'-gAgCAATATCggTCAgCCACA-3'                |                                             |
|                   | psaB-r                      | 5'-ACCACTCAAaggAgCgggAAC-3'                |                                             |
|                   | psbA-f                      | 5'-ACCCTCATTAgCagATTCgT-3'                 |                                             |
|                   | psbA-r                      | 5'-gATTgTATTCCAaggCagAgC-3'                |                                             |
|                   | rps14-f                     | 5'-TCACTCAAACCTCAAaggTA-3'                 |                                             |
|                   | rps14-r                     | 5'-AAgCggCagAAATTAgaAAC-3'                 |                                             |
|                   | atpA-f                      | 5'-TATCggTCAAAGAgCATC-3'                   |                                             |
|                   | atpA-r                      | 5'-CgTATAaggAgCgAggTA-3'                   |                                             |
|                   | petA-f                      | 5'-TgCCATTTAgCgAATAAgCC-3'                 |                                             |
|                   | petA-r                      | 5'-CCACATTCAACCCTCCCTTT-3'                 |                                             |
|                   | rpoB-f                      | 5'-TggTACATATCCCTTATCTCAA-3'               |                                             |
|                   | rpoB-r                      | 5'-CTCCAggACCCAAACAACCTC-3'                |                                             |
|                   | rps2-f                      | 5'-gAgATgATAgAAgCgggAgTT-3'                |                                             |
|                   | rps2-r                      | 5'-TAACATAATgACAACgAgCC-3'                 |                                             |
|                   | psbO-f                      | 5'-gCTCTACCggCTACgACAAC-3'                 |                                             |
|                   | psbO-r                      | 5'-TgACATCCTTgggCACCTT-3'                  |                                             |
|                   | psaD-f                      | 5'-CCgCTCAAAGTACAAgATCA-3'                 |                                             |
|                   | psaD-r                      | 5'-AAgAgCagCCTgACAgATgA-3'                 |                                             |
|                   | psaE-f                      | 5'-CCgCCAAgCCgCCTCCCATT-3'                 |                                             |
|                   | psaE-r                      | 5'-AgCTCgACgACgATCCATCC-3'                 |                                             |
| psbP-f            | 5'-AAgACAgATTCCgAgggTgg-3'  |                                            |                                             |
| psbP-r            | 5'-TgATTCgCTAgggATTAAGAg-3' |                                            |                                             |
| Lhcb2-f           | 5'-CCCCATCgAgAACCTCTTC-3'   |                                            |                                             |
| Lhcb2-r           | 5'-CggTgCgTggCTACTACAA-3'   |                                            |                                             |

|  |         |                                  |  |
|--|---------|----------------------------------|--|
|  | rcbs-f  | 5'-TgAgggCATCAAgAAgTT-3'         |  |
|  | rcbs-r  | 5'-CgATgATACggACAAAgg-3'         |  |
|  | actin-f | 5'-AggAaggCTggAAgAggACC-3'       |  |
|  | actin-r | 5'-CgggAAATTgTgAgggACAT-3'       |  |
|  | atpF-F1 | 5'-ggAgTgTgTgCgAgTTgTCT-3'       |  |
|  | atpF-R1 | 5'-TTTCgAgCTgCTCAATggT-3'        |  |
|  | atpF-R2 | 5'-TTCCAAACTAATAgAAgTggCATT-3'   |  |
|  | trnL-F1 | 5'-ATCCTgAgCCAAATCCATgT-3'       |  |
|  | trnL-R1 | 5'-gAgTTCCgCTAgCAACACAA-3'       |  |
|  | ndhA-F1 | 5'-TTCTTATggCaggATATAgCTCA-3'    |  |
|  | ndhA-R1 | 5'-TCAACTgTACTTgAACTgTTggATAA-3' |  |
|  | ndhB-F1 | 5'-CCCCTTTTCATCAATggACT-3'       |  |
|  | ndhB-R1 | 5'-TgAAgCagCAACTTTCgAAg-3'       |  |
|  | rpl2-F1 | 5'-gggTgggCAATTAgCTAgAg-3'       |  |
|  | rpl2-R1 | 5'-gTggCCgATTTACCTTCTTT-3'       |  |
|  | rpl2-F2 | 5'-AggCAAgTgAAATCCAATCC-3'       |  |
|  | rpl2-R2 | 5'-CCTCTATgCCTTgCggTAAT-3'       |  |
|  | ycf3-F1 | 5'-gCgAATAATTCCgACAACCT-3'       |  |
|  | ycf3-R1 | 5'-gCTTCCgCATAATTCCTTC-3'        |  |
|  | petD-F1 | 5'-gATCCgTTTgCAACTCCTCT-3'       |  |
|  | petD-R1 | 5'-CCATTAAgAgAACgCCCAAT-3'       |  |

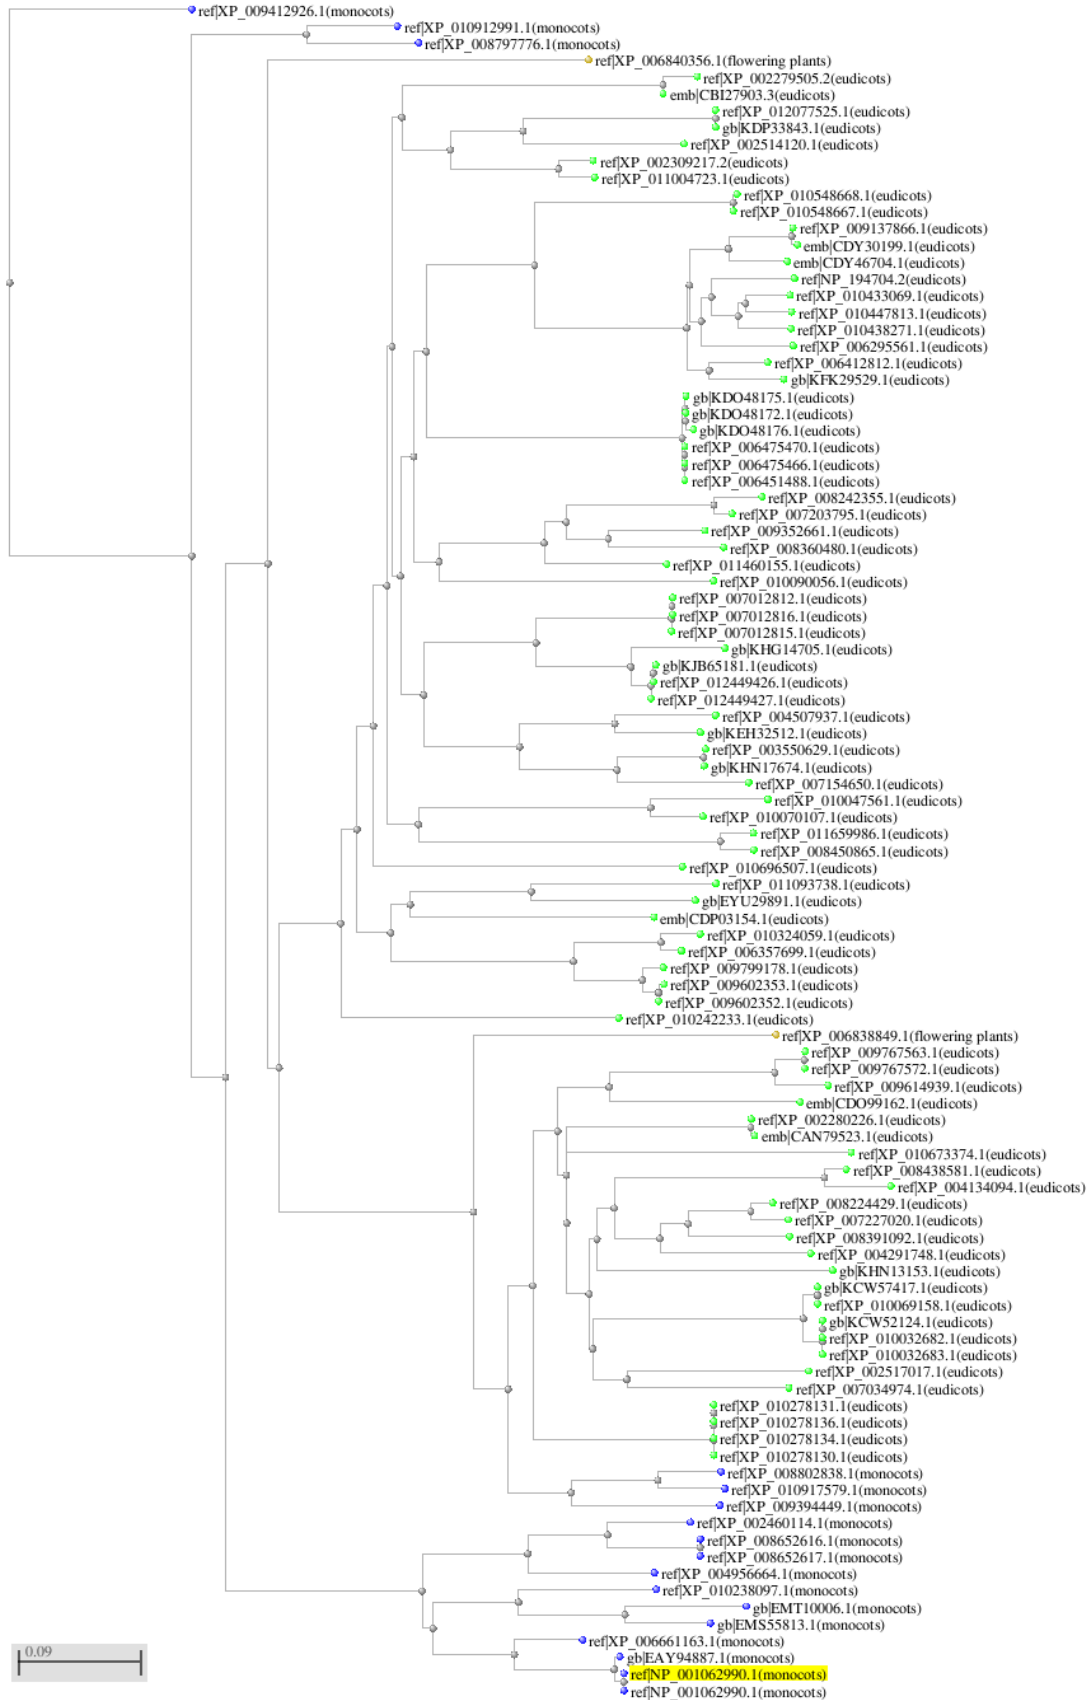

**Supplemental Figure S1.** Phylogenetic tree of AL2-like proteins among multiple organisms. The AL2 protein sequence (NCBI accession no: NP\_001062990.1) was used to do the BLASTp, and all 100 the putative AL2-like proteins were used to generate the phylogenetic tree from the Blast Tree View. GeneBank accession numbers of each AL2 protein and species (monocot or eudicot) are listed in parentheses.

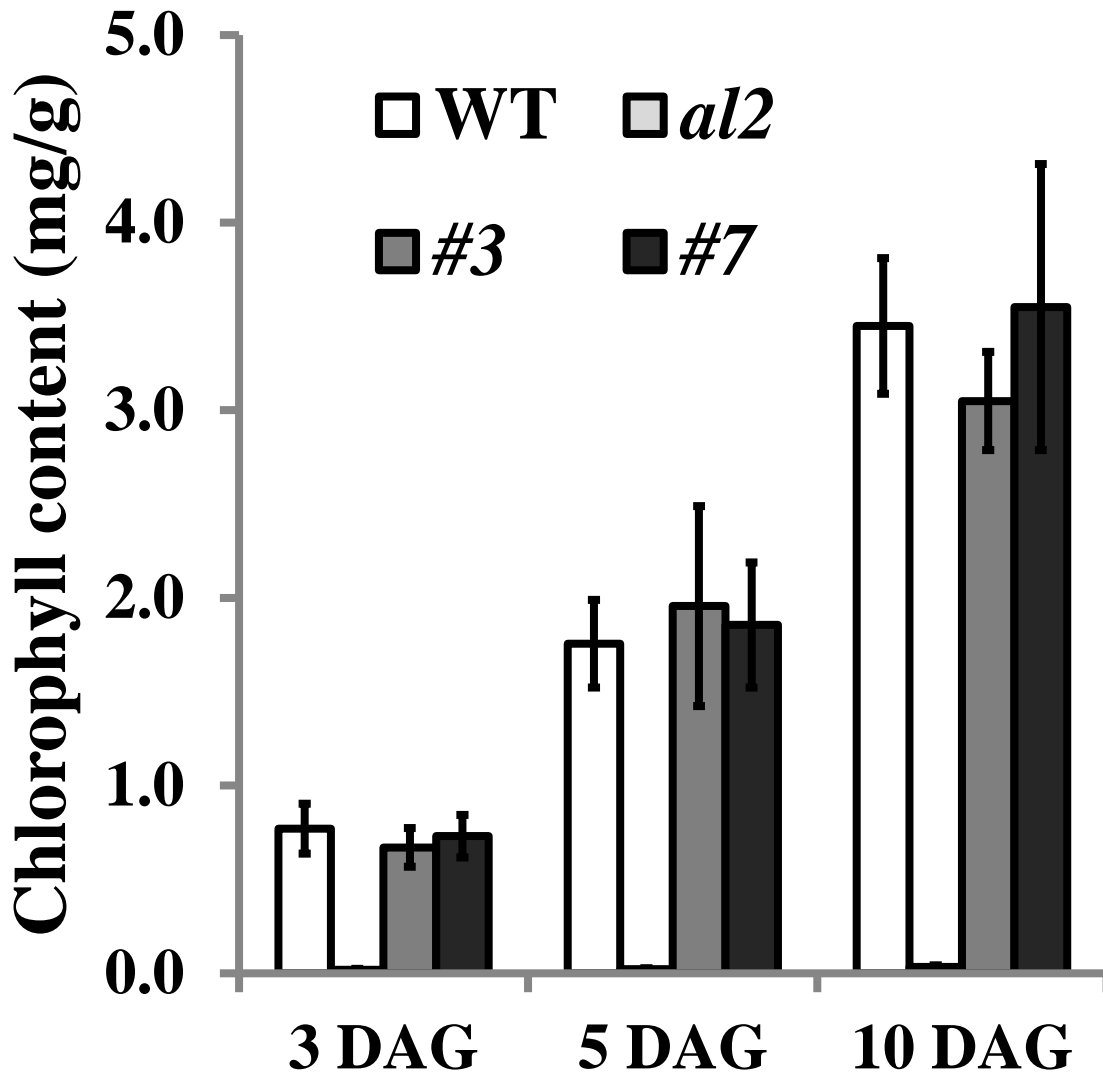

**Supplemental Figure S2.** Chlorophyll contents of complementation lines. #3 and #7 are the *AL2* complementing lines 3 and 7, respectively. DAG, day after germination. Values are the mean of three biological repeats.

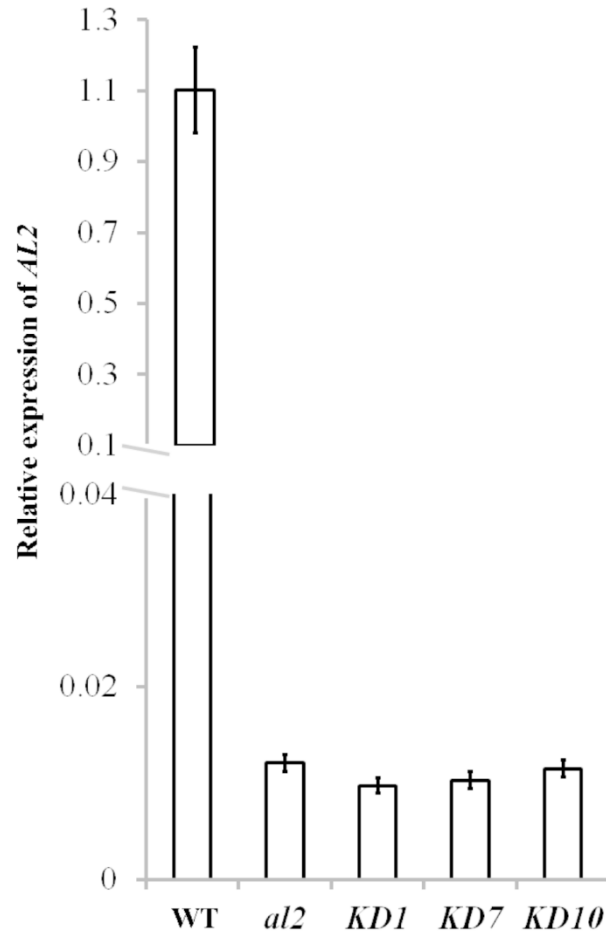

**Supplemental Figure S3.** Expression pattern of the *AL2* gene in the *AL2*-knock down lines. Relative expression of *AL2* in wild type, *al2*, *AL2* knockdown line 1 (*KD1*), *KD7* and *KD10* was determined by quantitative real time PCR (qRT-PCR). Values are the mean of three biological repeats with the SD.

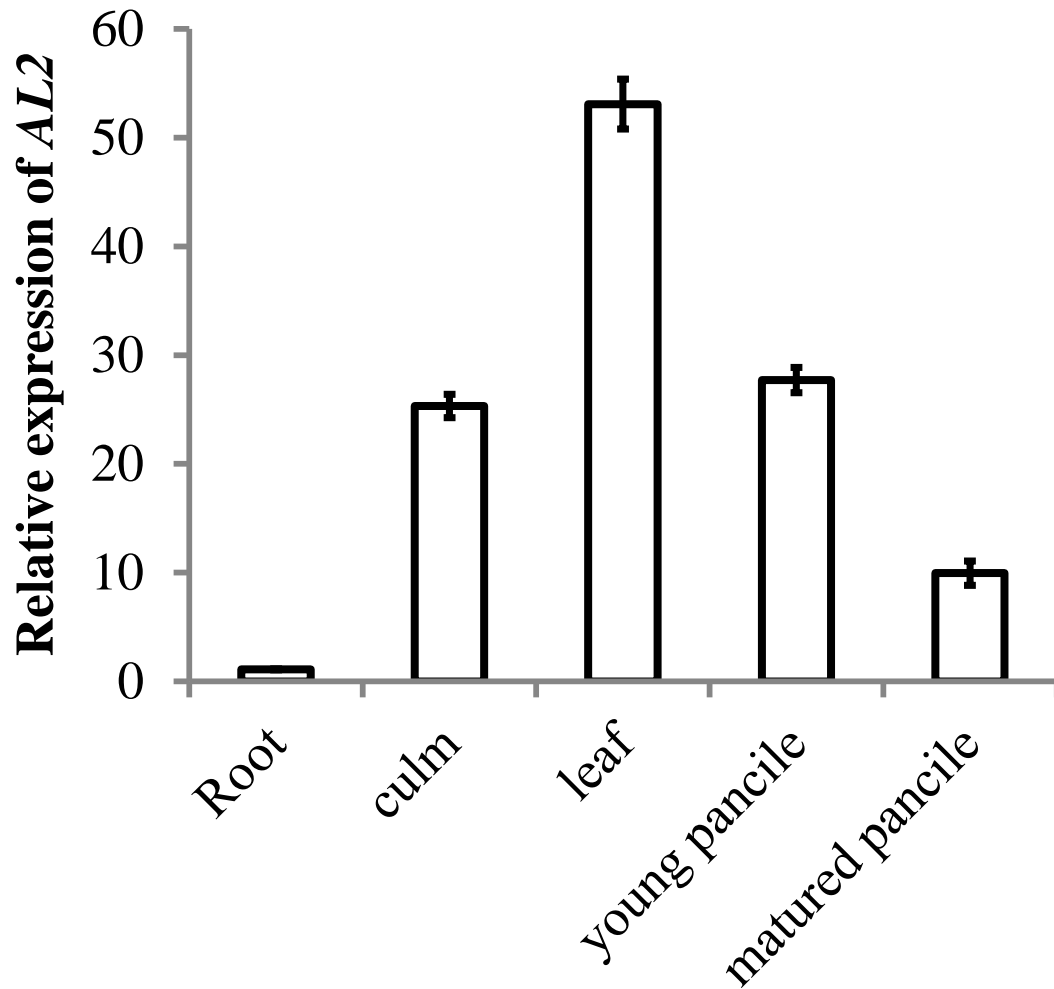

**Supplemental Figure S4.** Expression pattern of *AL2* gene in various tissues. Relative expression of *AL2* was determined by quantitative real time PCR (qRT-PCR). The tissues used in this experiment were derived from the heading stage. Values are the mean of three biological repeats with the SD.
